# Supplementary material for: Difference in Developmental Kinetics of Y-Specific Monoclonal Antibody Sorted Male and Female In Vitro Produced Bovine Embryos
Source: PubMed Central journal article supplement (PMC6981608; doi:10.3390/ijms21010244), 2019-12-30
Supplement: ijms-21-00244-s001.pdf [file ijms-21-00244-s001.pdf]

# Difference in developmental kinetics of Y-specific monoclonal antibody sorted male and female in-vitro produced bovine embryos

## SUPPLEMENTARY MATERIALS:

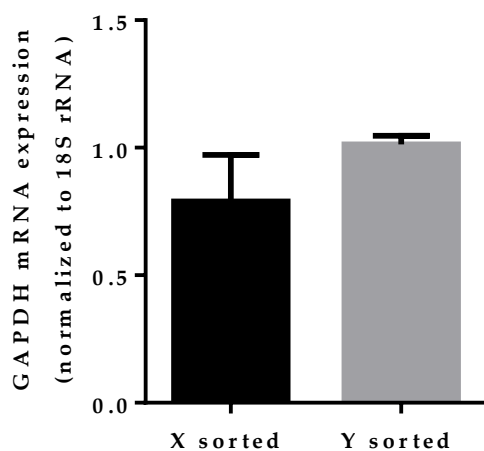

**FigureS1: Analysis of *GAPDH* expression stability in X and Y sorted embryos.** GAPDH expression in both X and Y sorted embryos were normalized with 18S RNA gene.

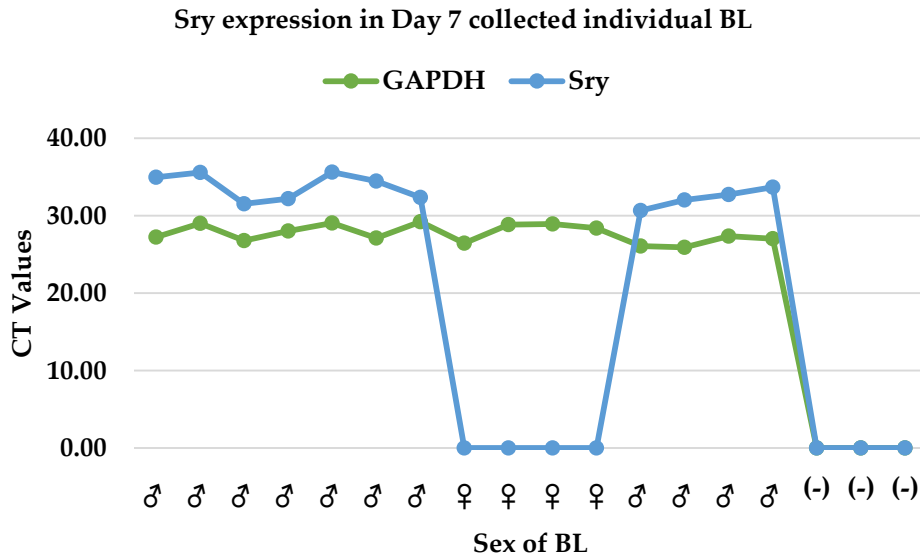

(a)

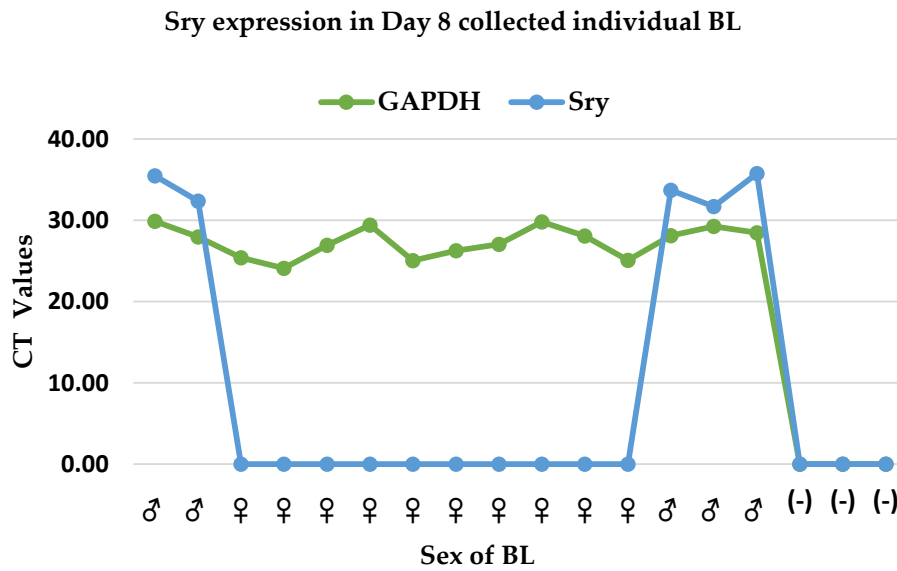

(b)

**Figure S2. qRT-PCR analysis for determining the ratio of Y BL from Day 7 and 8 expanded BLs. (a-b)** Representative graph showing the expression of *Sry* male specific gene from extracted genomic DNA of single BL. Occurrence of males and females in day 7 and 8 collected BLs is represented by Symbols (♂-male) and (♀-female). (-) indicates negative control.

**Table S1: Percentage of Cleavage and Blastocyst produced from unsorted and sex sorted sperm.**

| Groups   | Oocytes, n | Speculated Zygote, n | Cleaved Embryos, n %         | Total Blastocyst %          |
|----------|------------|----------------------|------------------------------|-----------------------------|
| Unsorted | 285        | 279                  | 218(78 ± 0.3) <sup>a</sup>   | 78(28 ± 0.4) <sup>a</sup>   |
| X sorted | 441        | 423                  | 221(52.3 ± 1.1) <sup>b</sup> | 97(23.1 ± 0.8) <sup>b</sup> |
| Y sorted | 413        | 386                  | 180(46.7 ± 0.6) <sup>c</sup> | 59(15.7 ± 1.0) <sup>c</sup> |

<sup>a,b</sup>  $p < 0.05$  with different superscript in the column indicate significant difference.

**Table S2: Percentage of male and female BL developed at day 7 and day 8 of post-fertilization.**

| Oocytes, (n) | Total BL obtained | Analyzed Expanded BL | % of ♂  | % of ♀  |
|--------------|-------------------|----------------------|---------|---------|
| 689          | 205(29%)          | Day 7                | 47(72%) | 18(27%) |
|              |                   | Day 8                | 19(31%) | 41(68%) |

**Table S3: List of qRT-PCR primers.**

| Gene Name | Forward                    | Reverse                  | Accession #    |
|-----------|----------------------------|--------------------------|----------------|
| GAPDH     | TTCAACGGCACAGTCAAGG        | ACATACTCAGCACCAGCATCAC   | NM_001034034   |
| Oct4      | AGGTGTTTACGCCAAACGACTAT    | GTCTCTGCCTTGCATATCTCCT   | NM_174580      |
| IGF-1R    | GATCCCGTGTCTTCTACGTTC      | CAGCCTGCTGCTATTTCTTTTT   | NM_001244612.1 |
| Ndufa9    | ATGGGGTCACAGGTGATTGT       | TCCCGTTCCAGTCCATAAAG     | NM_205817      |
| Nduv1     | GCCATGACTGGAGGCTTAAA       | ATTTAAGGCCAGTGGGGAAG     | NM_174808.1    |
| Cox4i     | CATGTTCTTCATCGGCTTCA       | TCATGTCGAGCATCCTCTTG     | BT021029       |
| Cox5b     | TCACCAACAAGCGGATAGTG       | TGTGGCACCAGCTTGTAATG     | NM_001034046.2 |
| Glut1     | ATCCTCATTGCCGTGGTGCT       | ACGATGCCAGAGCCGATGGT     | M60448         |
| Glut3     | CGCCTTTGGCACTCTCAAC        | GCACTGGATGATGGCTGGTAA    | AF308829       |
| Glut4     | CCACCAGGCACACTTACCACA      | CTCTTCCTTCCCAGCCACTGA    | U18105         |
| G6PD      | ACACCAAGATGATGACCA         | GAGCTTCACGTTCTTGTATCG    | NM_001244135.1 |
| HPRT      | GAAGAGCTACTGTAACGACCA      | AAAGTCTGCATTGTCTTCCC     | AF176419.1     |
| PGK       | CCTGTGGGTGTATTTGAATGG      | AGCACTTTACCTTCCAGGAG     | BT021601.1     |
| XIST      | CTGCTAATCGTTTGTGTTGTG      | ATACCATTTCTTTGCCTGTC     | AF104906.5     |
| DNMT1     | GTAAGATAGTGGTTGAGTTC       | AGAATCCTCTGTGAATCG       | AY173048.1     |
| DNMT3a    | ATCAAAGAAGACCCCTGGAAC      | AATTCCTGGTCATGGTTGTTGG   | AY271299       |
| DNMT3b    | AAGCAACCAGAGAATAAGACGC     | AAGCCATTTGTTCTCGACTCTG   | NM_181813      |
| 18SrRNA   | 5'-AGAAACGGCTACCACATCCA-3' | 5'-CACCAGACTTGCCCTCCA-3' | AF176811       |
| Sry       | GCCAAGACCACATACTCACAAA     | AATCCGTGTAGCCAATGTTACC   | AB039748.1     |

**Table S4: List of Antibodies used.**

| Target    | Cat #     | Manufacturer             |
|-----------|-----------|--------------------------|
| Caspase-3 | Sc-1225   | Santa Cruz               |
| H3K9me2   | Ab-1220   | Abcam                    |
| H3K9ac    | Sc-518011 | Santa Cruz               |
| DAPI      | 62248     | Thermo Fisher scientific |
| FITC      | B2119     | Santa Cruz               |
| TRITC     | A6071     | Invitrogen               |
